# Supplementary material for: Systematic Evolution and Study of UAGN Decoding tRNAs in a Genomically Recoded Bacteria
Source: PubMed Central journal article supplement (PMC4764823; doi:10.1038/srep21898), 2016-02-24
Supplement: srep21898-s1.pdf [file srep21898-s1.pdf]

# **Systematic Evolution and Study of UAGN Decoding tRNAs in a Genomically Recoded Bacteria**

Nanxi Wang,<sup>1</sup> Xin Shang,<sup>1</sup> Ronald Cerny,<sup>1</sup> Wei Niu,<sup>\*2</sup> Jiantao Guo<sup>\*1</sup>

1. Department of Chemistry, University of Nebraska-Lincoln,  
Lincoln, Nebraska, 68588, United States.

2. Department of Chemical & Biomolecular Engineering, University of Nebraska-Lincoln,  
Lincoln, Nebraska, 68588, United States.

\*To whom correspondence should be addressed: [jguo4@unl.edu](mailto:jguo4@unl.edu) and [wniu2@unl.edu](mailto:wniu2@unl.edu)

## Supporting Information

### Table of Contents

|                                          |    |
|------------------------------------------|----|
| I. Primers for library construction..... | 3  |
| II. Plasmids.....                        | 4  |
| III. Additional data                     |    |
| 1. Figure S1.....                        | 5  |
| 2. Figure S2.....                        | 6  |
| 3. Figure S3.....                        | 7  |
| 4. Figure S4.....                        | 8  |
| 5. Figure S5.....                        | 9  |
| 6. Figure S6.....                        | 10 |
| 7. Figure S7.....                        | 11 |
| 7. Figure S8.....                        | 12 |
| 7. Figure S9.....                        | 13 |
| 8. Table S1.....                         | 14 |

## I Primers for library construction.

Library-NCUA11:

Lib-F1: CATG**CCATGG**GTTCCACAGGGTAGCCAGCAGC

Library-NCUA11-R1: ATTCGATCTACATGATCAGGT

Library-NCUA11-F2:

TCATGTAGATCGAAT**NNNNNN**CU**NNNNN**GTTCAGCCGGGTTAGATTC

Lib-R2: CCG**CTCGAG**CAGAACATATCCATCGCGTCCGC

Library-CUA10

Lib-F1: CATG**CCATGG**GTTCCACAGGGTAGCCAGCAGC

Library-CUA10-R1: ATTCGATCTACATGATCAGGT

Library-CUA10-F2: TCATGTAGATCGAAT**NNNNNN**CU**NNNNN**GTTCAGCCGGGTTAGATTC

Lib-R2: CCG**CTCGAG**CAGAACATATCCATCGCGTCCGC

## Primers for mutagenesis.

pREP-BocLysRS-UAGN:

5'-CGCTCTAGACAATTGGTGAC-3'

5'-CTCATGGAAAACGGTGTAACAAG-3'

5'-ACCGTTTTCCATGAG**TAGN**ACTGAAACGTTTTTCATCGCTCTG-3'

5'-CCACTCATCGCAGTACTGTTG-3'

pLei-GFP<sub>UV</sub>-Asn149UAGN-tRNA-UAGN-wt (N = A, G, U, or C):

5'-GAGAAATTACATATGAGTAAAG-3'

5'-GTGTGAGTTATAGTTGTA-3'

5'-GTACAACTATAACTCACACT**TAGAG**TATACATCACGGCAGAC-3'

5'-GTACAACTATAACTCACACT**TAGGG**TATACATCACGGCAGAC-3'

5'-GTACAACTATAACTCACACT**TAGT**TATACATCACGGCAGAC-3'

5'-GTACAACTATAACTCACACT**TAGCG**TATACATCACGGCAGAC-3'

5'-GATGGAGCTCTTTGTAGAGTTC-3'

## II Plasmids

|                                   |                                                                                          |
|-----------------------------------|------------------------------------------------------------------------------------------|
| pBK-BocLysRS                      | <i>P<sub>glnS</sub> BocLysRS, Kan<sup>R</sup>, ColE1</i>                                 |
| pBK-AbkRS                         | <i>P<sub>glnS</sub> AbkRS, Kan<sup>R</sup>, ColE1</i>                                    |
| pBK-ONBKRS                        | <i>P<sub>glnS</sub> ONBKRS, Kan<sup>R</sup>, ColE1</i>                                   |
| pREP-BocLysRS-UAGA                | <i>P<sub>glnS</sub> BocLysRS, Tet<sup>R</sup>, Cm<sup>R</sup> (UAGA98), p15a</i>         |
| pREP-BocLysRS-UAGU                | <i>P<sub>glnS</sub> BocLysRS, Tet<sup>R</sup>, Cm<sup>R</sup> (UAGU98), p15a</i>         |
| pREP-BocLysRS-UAGG                | <i>P<sub>glnS</sub> BocLysRS, Tet<sup>R</sup>, Cm<sup>R</sup> (UAGG98), p15a</i>         |
| pREP-BocLysRS-UAGC                | <i>P<sub>glnS</sub> BocLysRS, Tet<sup>R</sup>, Cm<sup>R</sup> (UAGC98), p15a</i>         |
| <br>                              |                                                                                          |
| pGFP <sub>UV</sub> -UCUA-wt       | <i>T5 GFP<sub>UV</sub> (Asn149UAGA), lpp tRNA<sub>UCUA</sub>, Cm<sup>R</sup>, p15a</i>   |
| pGFP <sub>UV</sub> -ACUA-wt       | <i>T5 GFP<sub>UV</sub> (Asn149UAGA), lpp tRNA<sub>ACUA</sub>, Cm<sup>R</sup>, p15a</i>   |
| pGFP <sub>UV</sub> -CCUA-wt       | <i>T5 GFP<sub>UV</sub> (Asn149UAGA), lpp tRNA<sub>CCUA</sub>, Cm<sup>R</sup>, p15a</i>   |
| pGFP <sub>UV</sub> -GCUA-wt       | <i>T5 GFP<sub>UV</sub> (Asn149UAGA), lpp tRNA<sub>GCUA</sub>, Cm<sup>R</sup>, p15a</i>   |
| <br>                              |                                                                                          |
| pGFP <sub>UV</sub> -UAGN          | <i>T5 GFP<sub>UV</sub> (Asn149UAGA), Cm<sup>R</sup>, p15a</i>                            |
| <br>                              |                                                                                          |
| pGFP <sub>UV</sub> -NCUA-X        | <i>T5 GFP<sub>UV</sub> (Asn149UAGA), lpp tRNA hit-X, Cm<sup>R</sup>, p15a</i>            |
| <br>                              |                                                                                          |
| pGFP <sub>UV</sub> -UAGA-BocLysRS | <i>T5 GFP<sub>UV</sub> (Asn149UAGA), P<sub>glnS</sub> BocLysRS, Cm<sup>R</sup>, p15a</i> |
| pGFP <sub>UV</sub> -UAGU-BocLysRS | <i>T5 GFP<sub>UV</sub> (Asn149UAGU), P<sub>glnS</sub> BocLysRS, Cm<sup>R</sup>, p15a</i> |
| pGFP <sub>UV</sub> -UAGG-BocLysRS | <i>T5 GFP<sub>UV</sub> (Asn149UAGG), P<sub>glnS</sub> BocLysRS, Cm<sup>R</sup>, p15a</i> |
| pGFP <sub>UV</sub> -UAGC-BocLysRS | <i>T5 GFP<sub>UV</sub> (Asn149UAGC), P<sub>glnS</sub> BocLysRS, Cm<sup>R</sup>, p15a</i> |
| <br>                              |                                                                                          |
| pGFP <sub>UV</sub> -UAG-BocLysRS  | <i>T5 GFP<sub>UV</sub> (Asn149UAG), P<sub>glnS</sub> BocLysRS, Cm<sup>R</sup>, p15a</i>  |
| <br>                              |                                                                                          |
| pBK-library-NCUA11                | <i>lpp tRNA<sub>NCUA</sub> library, Kan<sup>R</sup>, ColE1</i>                           |
| pBK-Library-CUA10                 | <i>lpp tRNA<sub>CUA</sub> library, Kan<sup>R</sup>, ColE1</i>                            |
| pBK-tRNA-hit                      | <i>lpp tRNA<sub>NCUA</sub> hit, Kan<sup>R</sup>, ColE1</i>                               |

### III Additional data

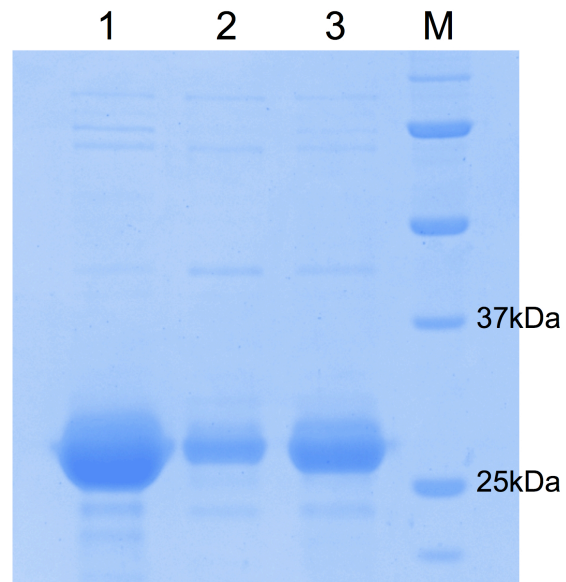

**Figure S1. Purification of GFPuv mutants.**

Proteins were purified using Ni Sepharose 6 Fast Flow resin. Lane 1, purified mutant GFPuv protein that was obtained from the suppression of an UAGA codon by tRNA hit UAGA-1; Lane 2, purified mutant GFPuv protein that was obtained from the suppression of an UAGU codon by tRNA hit UAGU-1; Lane 3, purified mutant GFPuv protein that was obtained from the suppression of an UAGG codon by tRNA hit UAGG-2; lane 4, molecular weight marker.

LEYNYNSHBoc-LysVYITADK

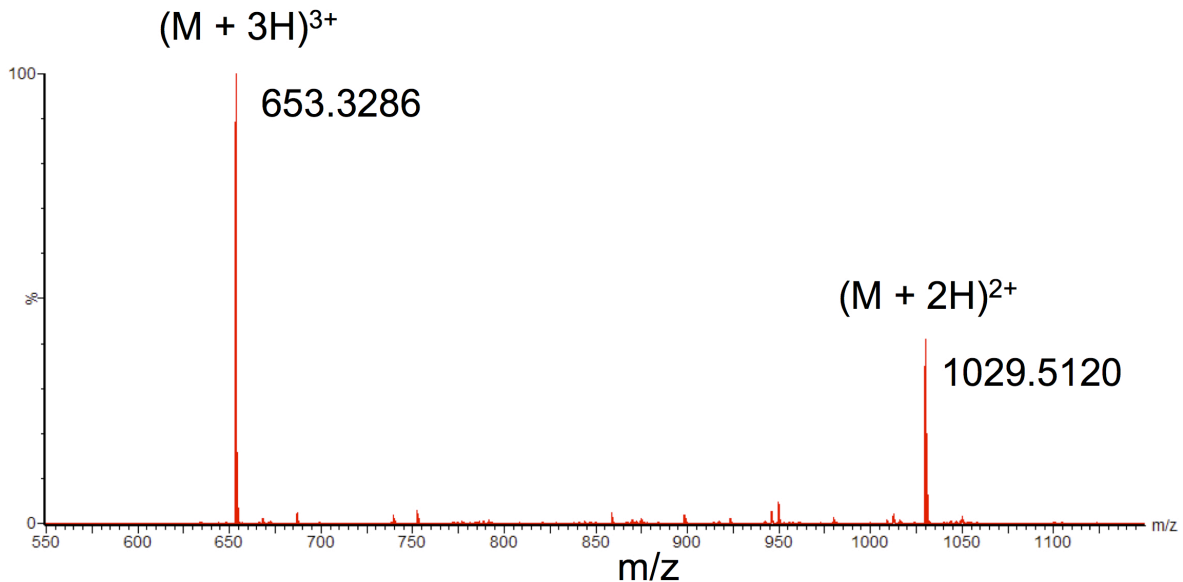

**Figure S2. Mass spectrometry analysis of GFPuv containing Boc-Lys at position 149 (suppression of an UAGU codon).**

The amino acid sequence of the peptide fragment, LEYNYNSHBoc-LysVYITADK, from mutant GFPuv containing Boc-Lys is shown on top. Two mass peaks were observed. The  $(M + 2H)^{2+}$  peak corresponds to LEYNYNSHBoc-LysVYITADK that contains an intact Boc-Lys residue at position 149. The  $(M + 3H)^{3+}$  peak corresponds to LEYNYNSHKVYITADK that contains a lysine residue at position 149 due to the loss of Boc group under the mass spectrometry conditions. (**Note:** The Boc-LysRS cannot charge the tRNA with lysine. The observed peptide that contains a lysine at position 149 must be derived from the cleavage of the Boc group.)

Theoretical monoisotopic  $(M + 3H)^{3+}$  ion: 653.3272  
Observed monoisotopic  $(M + 3H)^{3+}$  ion: 653.3286

Theoretical monoisotopic  $(M + 2H)^{2+}$  ion: 1029.5131  
Observed monoisotopic  $(M + 2H)^{2+}$  ion: 1029.5120

LEYNYNSHBoc-LysVYITADK

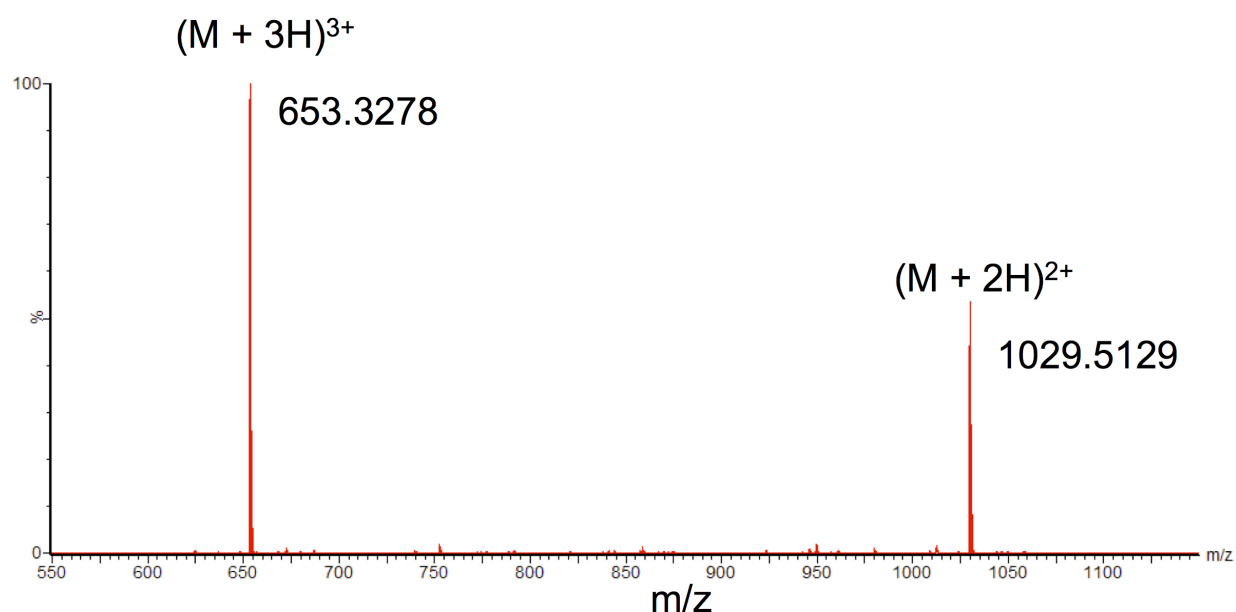

**Figure S3. Mass spectrometry analysis of GFPuv containing Boc-Lys at position 149 (suppression of an UAGG codon).**

The amino acid sequence of the peptide fragment, LEYNYNSHBoc-LysVYITADK, from mutant GFPuv containing Boc-Lys is shown on top. Two mass peaks were observed. The  $(M + 2H)^{2+}$  peak corresponds to LEYNYNSHBoc-LysVYITADK that contains an intact Boc-Lys residue at position 149. The  $(M + 3H)^{3+}$  peak corresponds to LEYNYNSHKVYITADK that contains a lysine residue at position 149 due to the loss of Boc group under the mass spectrometry conditions. (**Note:** The Boc-LysRS cannot charge the tRNA with lysine. The observed peptide that contains a lysine at position 149 must be derived from the cleavage of the Boc group.)

Theoretical monoisotopic  $(M + 3H)^{3+}$  ion: 653.3272  
Observed monoisotopic  $(M + 3H)^{3+}$  ion: 653.3278

Theoretical monoisotopic  $(M + 2H)^{2+}$  ion: 1029.5131  
Observed monoisotopic  $(M + 2H)^{2+}$  ion: 1029.5129

LEYNYNSHBoc-LysVYITADK

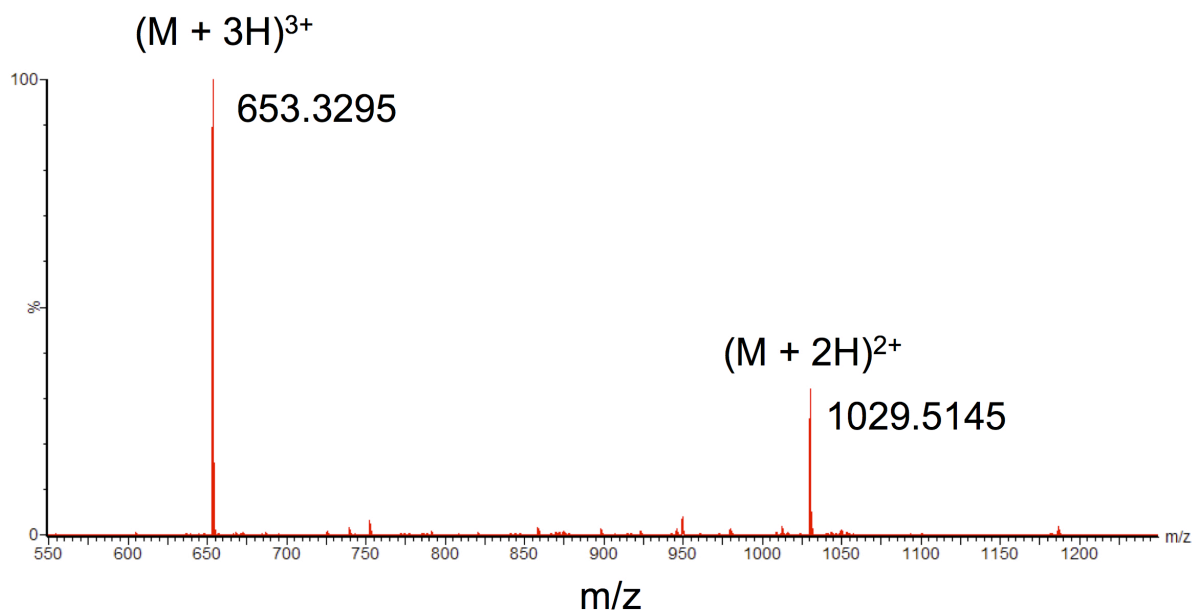

**Figure S4. Mass spectrometry analysis of GFPuv containing Boc-Lys at position 149 (suppression of an UAGA codon).**

The amino acid sequence of the peptide fragment, LEYNYNSHBoc-LysVYITADK, from mutant GFPuv containing Boc-Lys is shown on top. Two mass speaks were observed. The  $(M + 2H)^{2+}$  peak corresponds to LEYNYNSHBoc-LysVYITADK that contains an intact Boc-Lys residue at position 149. The  $(M + 3H)^{3+}$  peak corresponds to LEYNYNSHKVYITADK that contains a lysine residue at position 149 due to the loss of Boc group under the mass spectrometry conditions. (**Note:** The Boc-LysRS cannot charge the tRNA with lysine. The observed peptide that contains a lysine at position 149 must be derived from the cleavage of the Boc group.)

Theoretical monoisotopic  $(M + 3H)^{3+}$  ion: 653.3272  
Observed monoisotopic  $(M + 3H)^{3+}$  ion: 653.3295

Theoretical monoisotopic  $(M + 2H)^{2+}$  ion: 1029.5131  
Observed monoisotopic  $(M + 2H)^{2+}$  ion: 1029.5145



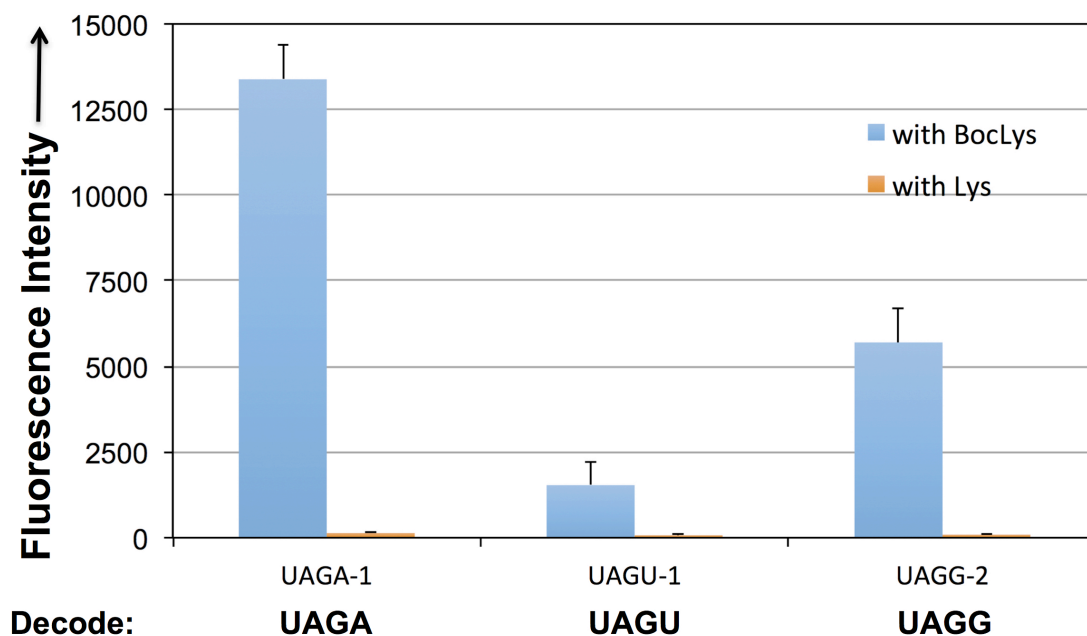

**Figure S5. Genetic incorporation of Boc-Lys versus Lys.**

Fluorescence readings of *E. coli* C321.ΔA cells expressing the evolved tRNA<sup>Pyl</sup><sub>NCUA</sub> mutants, each co-expressed with BocLysRS and corresponding GFP<sub>UV</sub>-Asn149UAGN. The expression tests were conducted in the presence of either 5 mM BocLys or 5 mM Lys. The results indicated that the BocLysRS is unable to incorporate Lys and that the observed Lys residues in the mass spectrometry analyses were from the degradation of Boc-Lys. Fluorescence intensity was normalized to cell growth. Each data point is the average of triplicate measurements with standard deviation.

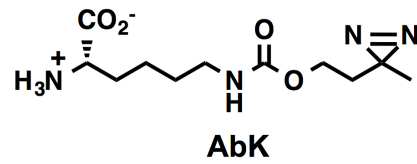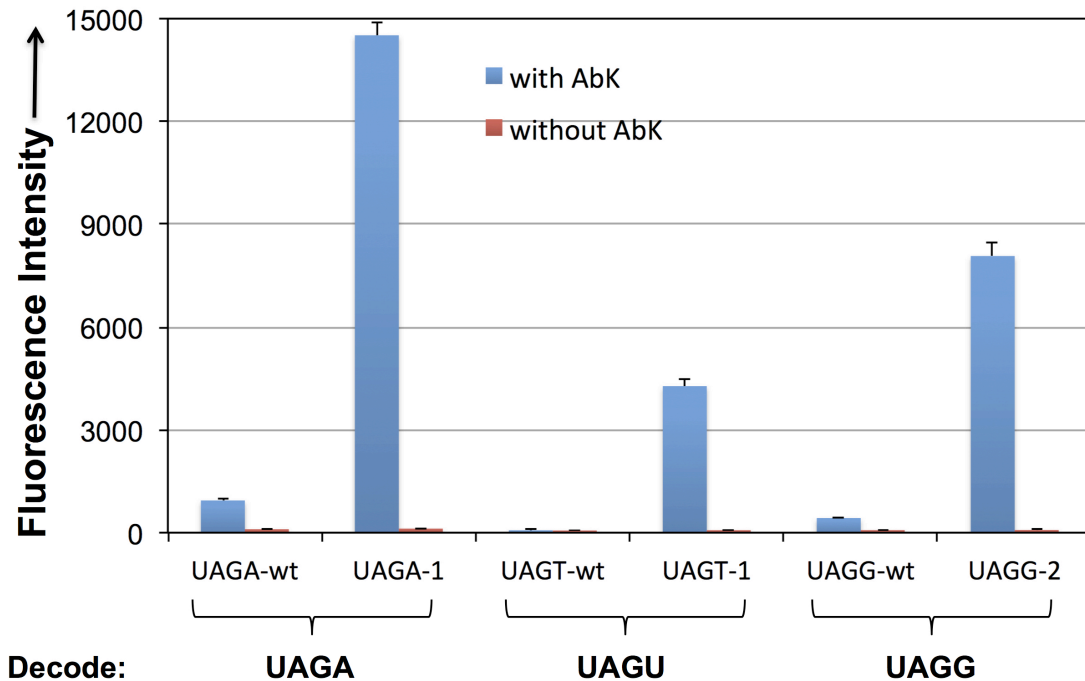

**Figure S6. Incorporation of AbK using the evolved  $tRNA_{NCUA}^{Pyl}$  variants.**

Fluorescence readings of *E. coli* C321.ΔA cells expressing  $tRNA_{NCUA}^{Pyl}$ -wt or the evolved  $tRNA_{NCUA}^{Pyl}$  mutants, each coexpressed with AbKRS (a pyrrolysyl-tRNA synthetase mutant that specifically charges  $tRNA^{Pyl}$  with Abk) and corresponding GFP<sub>UV</sub>-Asn149UAGN. The expressions were conducted either in the presence or in the absence of 1 mM AbK. Fluorescence intensity was normalized to cell growth. Each data point is the average of triplicate measurements with standard deviation. AbK, 3'-azibutyl-N-carbamoyl-lysine.

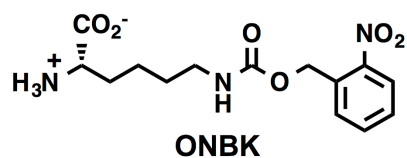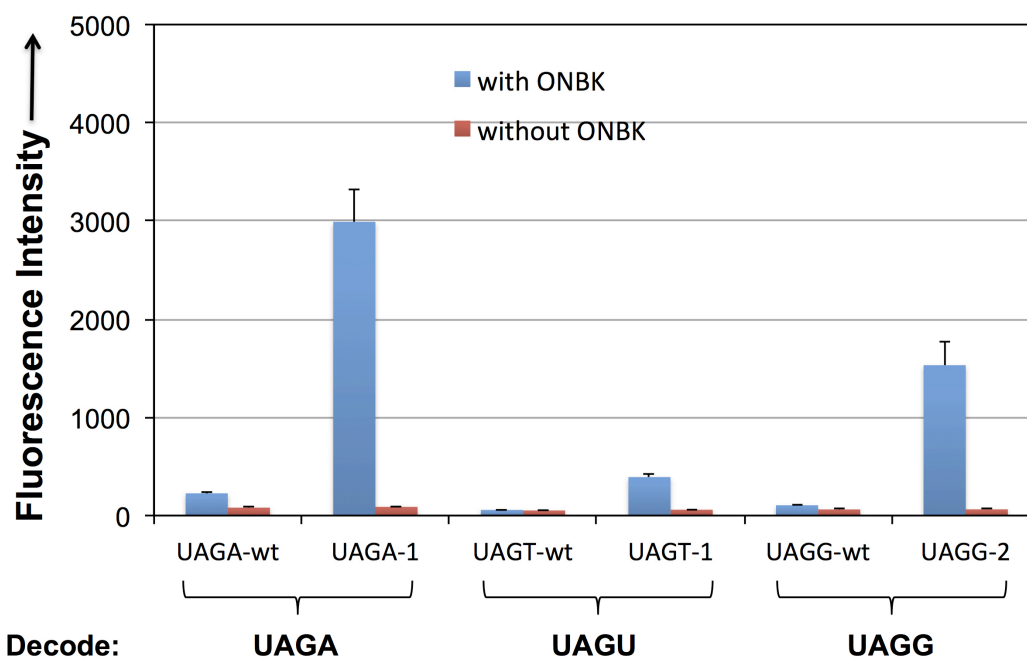

**Figure S7. Incorporation of ONBK using the evolved  $tRNA^{Pyl}_{NCUA}$  variants.**

Fluorescence readings of *E. coli* C321.ΔA cells expressing  $tRNA^{Pyl}_{NCUA}$ -wt or the evolved  $tRNA^{Pyl}_{NCUA}$  mutants, each coexpressed with ONBKRS (a pyrrolysyl-tRNA synthetase mutant that specifically charges  $tRNA^{Pyl}$  with ONBK) and corresponding GFP<sub>UV</sub>-Asn149UAGN. The expressions were conducted either in the presence or in the absence of 1 mM ONBK. Fluorescence intensity was normalized to cell growth. Each data point is the average of triplicate measurements with standard deviation. ONBK, o-nitrobenzyl-oxy-carbonyl-N $\epsilon$ -L-lysine.

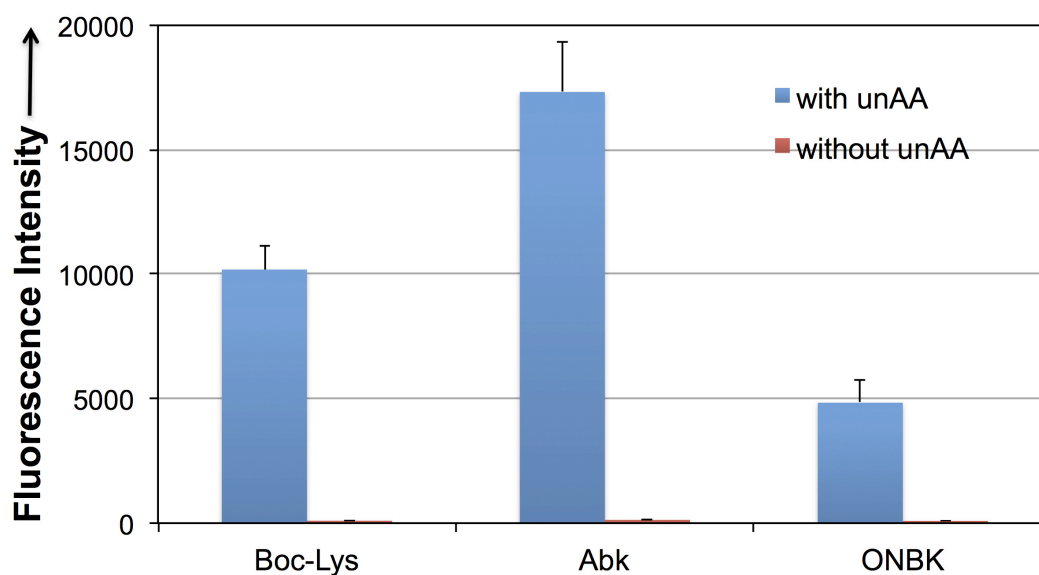

**Figure S8. Incorporation of Boc-Lys, Abk, and ONBK in response to amber codon.**

Fluorescence readings of *E. coli* C321.ΔA cells expressing  $tRNA_{CUA}^{Pyl}$ , GFP<sub>UV</sub>-Asn149UAG, and a PyIRS variant of interest (BocLysRS, AbkRS, or ONBKRS). The expressions were conducted either in the presence or absence of an unAA of interest (Boc-Lys, 5 mM; ABK, 1 mM; ONBK, 1 mM). Fluorescence intensity was normalized to cell growth. Each data point is the average of triplicate measurements with standard deviation. Boc-Lys, *N*ε-(tert-butyloxy-carbonyl)-L-lysine; Abk, 3'-azibutyl-N-carbamoyl-lysine; ONBK, *o*-nitrobenzyl-oxycarbonyl-Nε-L-lysine.

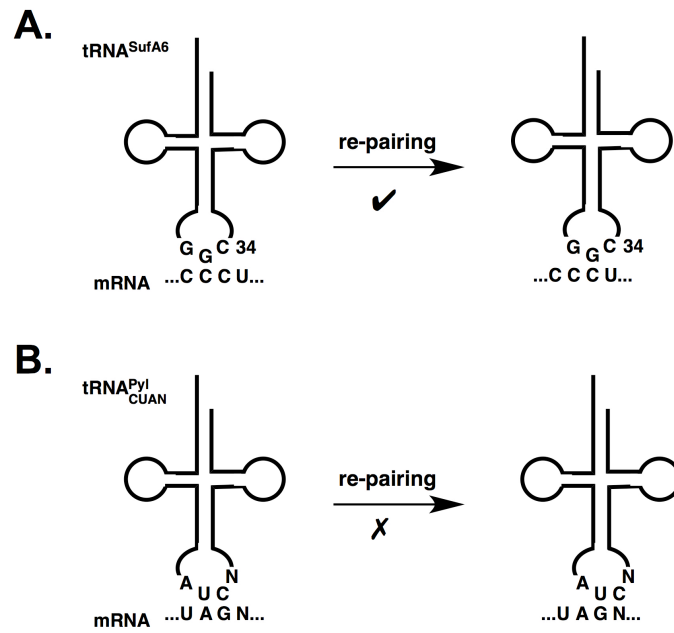

**Figure S9. Anticodon-mRNA re-pairing in the P site.**

(A) A favorable re-pairing of tRNA<sup>SufA6</sup> in the +1 frame; (B) An unfavorable re-pairing of tRNA<sup>Pyl</sup><sub>NCUA</sub> in the +1 frame.

**Table S1. Additional tRNA<sup>Pyl</sup><sub>NCUA</sub> mutants with improved UAGN decoding activity. Sequences of each tRNA<sup>Pyl</sup><sub>NCUA</sub> variant at randomized positions are listed.**

| Codon | tRNA variants | Positions |       |      |        |       |
|-------|---------------|-----------|-------|------|--------|-------|
|       |               | 29-31     | 32,33 | 33.5 | 37, 38 | 39-41 |
| UAGA  | UAGA-4        | C G G     | C U   | U    | A U    | C U U |
|       | UAGA-5        | G G G     | C U   | U    | A U    | C C C |
|       | UAGA-6        | G G A     | C U   | U    | A U    | C U C |
| UAGU  | UAGU-4        | U G G     | C U   | A    | A U    | C U U |
| UAGG  | UAGG-4        | U G G     | C U   | A    | A U    | C U U |

Notes:

- (1) UAGU-4 AND UAGG-4 are converged into the same sequence.
- (2) The tRNA sequences are based on the sequences of the coding DNA.
